# Supplementary material for: Experimental Generation of SNP Haplotype Signatures in Patients with Sickle Cell Anaemia
Source: PLoS One. 2010 Sep 24;5(9):e13004. doi: 10.1371/journal.pone.0013004 (PMC2945316; doi:10.1371/journal.pone.0013004)
Supplement: Table S1 — Individual digital-array haplotyping experiments of patient samples with SNP marker pair rs9399137–rs9402685. (0.02 MB XLS) [file pone.0013004.s002.xls]

## Sheet: Table_S1
Patient ID	FAM allele	FAM Targets	VIC allele	VIC Targets	% co-localization		haplotypes
6	rs9399137-T	45	rs9402685-T	48	0.8	(in phase)	T-T and C-C
	rs9399137-T	46	rs9402685-T	56	0.869565	(in phase)	T-T and C-C
	rs9399137-T	37	rs9402685-C	58	0.0540541	(in repulsion)	T-T and C-C
	rs9399137-T	38	rs9402685-C	58	0	(in repulsion)	T-T and C-C
15	rs9399137-T	65	rs9402685-T	64	0.765625	(in phase)	T-T and C-C
	rs9399137-T	45	rs9402685-T	45	0.755556	(in phase)	T-T and C-C
	rs9399137-T	38	rs9402685-C	49	0	(in repulsion)	T-T and C-C
	rs9399137-T	60	rs9402685-C	58	0	(in repulsion)	T-T and C-C
31	rs9399137-T	55	rs9402685-T	59	0.945455	(in phase)	T-T and C-C
	rs9399137-T	53	rs9402685-T	59	0.981132	(in phase)	T-T and C-C
	rs9399137-T	57	rs9402685-C	60	0.0526316	(in repulsion)	T-T and C-C
	rs9399137-T	64	rs9402685-C	66	0.0625	(in repulsion)	T-T and C-C
32	rs9399137-T	38	rs9402685-T	41	0.789474	(in phase)	T-T and C-C
	rs9399137-T	40	rs9402685-T	42	0.85	(in phase)	T-T and C-C
	rs9399137-T	59	rs9402685-C	56	0.0714286	(in repulsion)	T-T and C-C
	rs9399137-T	46	rs9402685-C	44	0.0681818	(in repulsion)	T-T and C-C
42	rs9399137-T	45	rs9402685-T	50	0.866667	(in phase)	T-T and C-C
	rs9399137-T	46	rs9402685-T	50	0.76087	(in phase)	T-T and C-C
	rs9399137-T	50	rs9402685-C	39	0.0769231	(in repulsion)	T-T and C-C
	rs9399137-T	50	rs9402685-C	61	0.1	(in repulsion)	T-T and C-C
46	rs9399137-T	64	rs9402685-T	63	0.952381	(in phase)	T-T and C-C
	rs9399137-T	55	rs9402685-T	61	0.909091	(in phase)	T-T and C-C
	rs9399137-T	56	rs9402685-C	40	0.1	(in repulsion)	T-T and C-C
	rs9399137-T	55	rs9402685-C	47	0.0425532	(in repulsion)	T-T and C-C
61	rs9399137-T	57	rs9402685-T	66	0.947368	(in phase)	T-T and C-C
	rs9399137-T	46	rs9402685-T	59	0.891304	(in phase)	T-T and C-C
	rs9399137-T	57	rs9402685-C	69	0.105263	(in repulsion)	T-T and C-C
	rs9399137-T	37	rs9402685-C	54	0.0810811	(in repulsion)	T-T and C-C
